# Supplementary material for: GWAS in a Box: Statistical and Visual Analytics of Structured Associations via GenAMap
Source: PLOS journal article supplement (doi:10.1371/journal.pone.0097524), 2014-06-06
Supplement: S5 (10.1371/journal.pone.0097524.s005) [file journal.pone.0097524.s005]

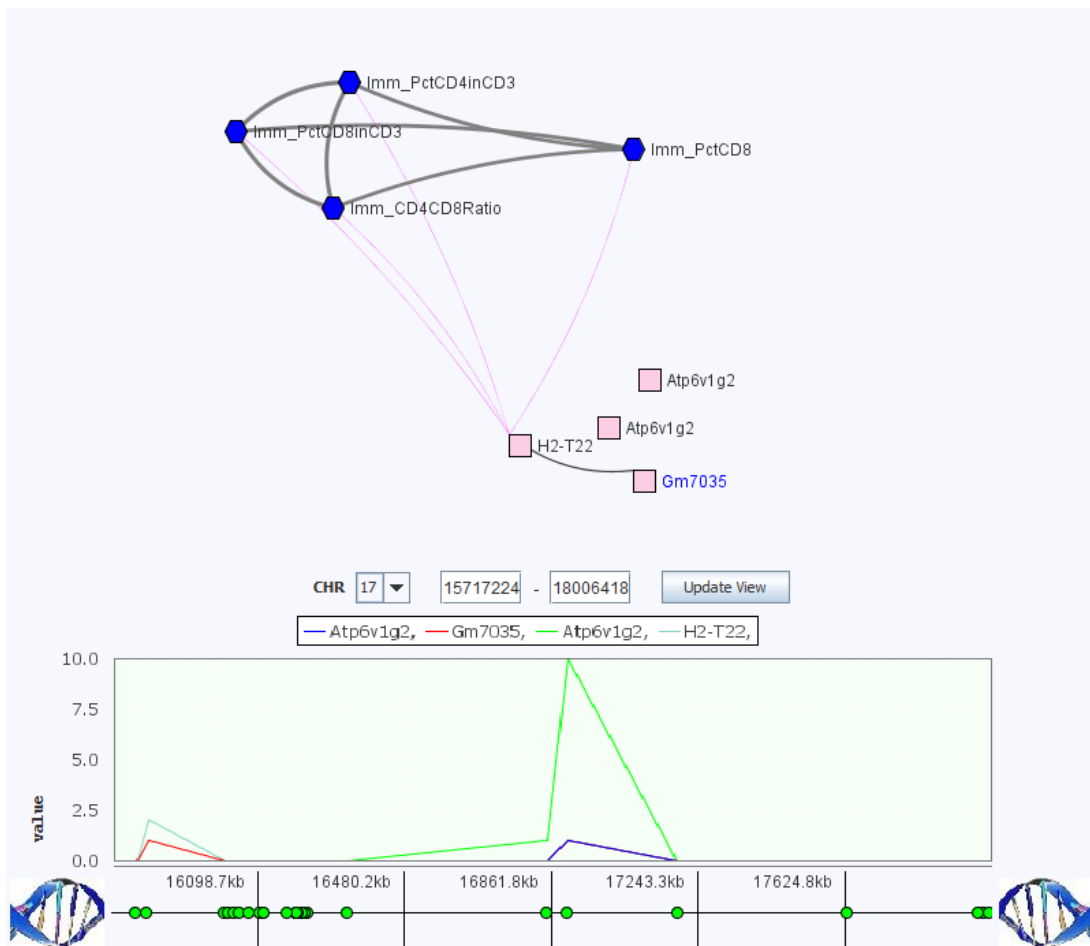

**Figure S5. Immunity associations from chromosome 17.**

We found a small group of genes associated with the H2 region on chromosome 17. We also found that these genes were associated with a subset of immunology traits.
